# Supplementary material for: Solution combustion synthesis of highly dispersible and dispersed iridium oxide as an anode catalyst in PEM water electrolysis
Source: Royal Society of Chemistry journal article supplement (doi:10.1039/c6ta11047a), 2017-01-01
Supplement: c6ta11047a1.pdf [file c6ta11047a1.pdf]

## **Electronic Supplementary Information (ESI)**

### **Solution combustion synthesis of highly dispersible and dispersed iridium oxide as anode catalyst in PEM water electrolysis**

Muralidhar G. Chourashiya and Atsushi Urakawa\*

Institute of Chemical Research of Catalonia (ICIQ), The Barcelona Institute of Science and Technology (BIST), Av. Països Catalans 16, 43007 Tarragona, Spain.

\* Corresponding author: [aurakawa@iciq.es](mailto:aurakawa@iciq.es)

## S1. Introduction

### S1.1. Water electrolysis playing crucial role in conceptual distributed energy production

In a conceptual distributed energy production, conversion, storage and use system, e.g. for off-grid locations, the water electrolysis can play an important role (Figure S1) <sup>1</sup>.

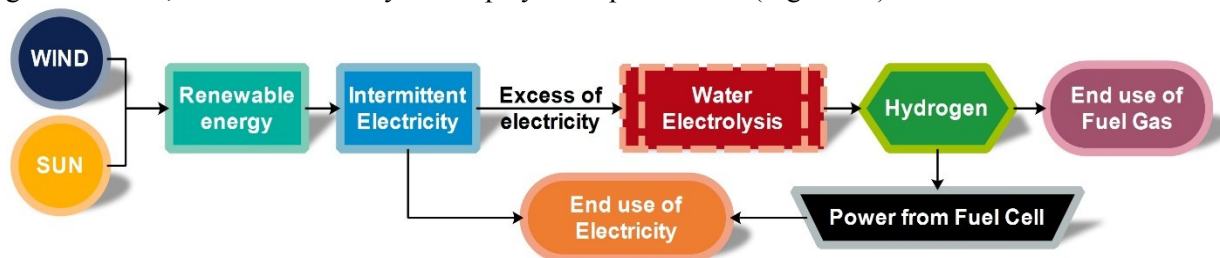

Figure S1. Schematic illustration of a conceptual distributed energy system with water electrolysis playing an important role in hydrogen production as a fuel gas and energy storage mechanism.<sup>1</sup>

### S1.2. Bottleneck for the $\text{IrO}_2$ or $\text{IrO}_2$ -based catalysts in PEM water electrolysis and its resolution

The major bottleneck for the  $\text{IrO}_2$  or  $\text{IrO}_2$ -based catalysts in PEM water electrolysis is its inherent high cost and required high loading (thus high cost) of about  $3 \text{ mg/cm}^2$ . At present, as there are no convincing alternatives for  $\text{IrO}_2$  or  $\text{IrO}_2$ -based catalysts as anode in PEM water electrolysis, reduction of their loading is only viable option to resolve this bottleneck. This can be achieved by two strategies, (i) enhancing the activity of  $\text{IrO}_2$  further by synthesizing it in nano-structured form and (ii) prepare  $\text{IrO}_2$  catalyst in a supported or dispersed form. Both the strategies if employed simultaneously using a simple, fast, efficient and cost-effective synthesis method can lead to reduction of overall catalyst-cost, resolving the bottleneck for commercialization of PEM water electrolysis.

### S1.3. Reported synthesis methods for nano-structured $\text{IrO}_2$ and their drawbacks

Nanostructured  $\text{IrO}_2$  have been synthesized by variety of methods, for example, metal organic chemical vapor deposition (MOCVD) method<sup>2</sup>, vapor phase transport process<sup>3</sup>, electrochemical synthesis<sup>4</sup>, arc vaporization<sup>5</sup>, hydrothermal<sup>6</sup>, reactive radio frequency magnetron sputtering (RFMS)<sup>7</sup>, wetness method<sup>8</sup>, thermal decomposition of precursor ( $\text{H}_2\text{IrCl}_6$ )<sup>9</sup> and oleylamine-mediated synthesis<sup>10</sup>. In the last decade, the Adams fusion method<sup>11</sup> is preferred to produce fine (nano-structured) platinum-group-metal (PGM) oxide powders and has been used widely for synthesis of iridium oxide<sup>12-14</sup>. The sol-gel method reported to yield nano-structured noble metal oxides<sup>15</sup> while a modified polyol method was reported to produce nano-structure  $\text{IrO}_2$ <sup>12, 16, 17</sup>. Most of these reported synthesis methods use the iridium chloride as precursor and are synthesized at temperatures less than  $500^\circ\text{C}$ , leading to chloride impurities in the final product.

To overcome the impurity issue, a sulfite-complex route was proposed, in which iridium chloride is firstly converted to a sulfite-complex, which further precipitated as iridium hydroxide hydrate with the help of addition of hydrogen peroxide at  $80^\circ\text{C}$  and calcining it at  $350^\circ\text{C}$  to give a 'chloride-free' iridium oxide<sup>18, 19</sup>. Most of these methods employ expensive, complex or unstable iridium-containing precursors followed with tedious synthetic procedures. Recent publication on molten salt synthesis process presents an alternate to above mentioned synthetic methods for  $\text{IrO}_2$ <sup>20</sup>. Main disadvantage of these solution based methods are in their washing and thermal treatment step, where the very fine particles obtained undergo uncontrolled agglomeration and lose its dispersing ability (required for catalyst-ink preparation), leading to poor quality catalyst coatings over PEM electrolyte. Solution combustion synthesis (SCS) is a simple and fast method to produce high-surface-area oxide (dry and highly dispersible) catalysts in single step,

which does not need any washing or further heat treatment. High dispersing ability of products are attributed to unique porous morphology produced by solution combustion method.

#### ***S1.4. Advantage and simplicity of solution combustion synthesis (SCS)***

SCS is a combustion synthesis process, a highly exothermic and self-sustaining reaction, and has been used to synthesize a variety of compounds including binary/complex oxides<sup>21, 22</sup>. As the name suggests, a precursor is used in a solution form which is usually metal nitrate (oxidizers: source of metal species) in the presence of chemical fuel such as glycine, urea, etc. (Figure S2). During SCS, development of high temperature gradient in the synthesis media occurs along with the production of voluminous gases which continuously escapes to atmosphere. High-temperature produced during SCS annihilates the volatile impurities in the synthesis media and often an impurity-free or low-impurity final product can be produced. A vigorous reaction at high temperatures for a short time and escaping-voluminous gases lead to the formation of oxide phase, but they also obstructs the crystallite/grain-growth in the product. Evolving gases during SCS have been known to produce porous microstructures in the final product, resulting in a high-surface-area.

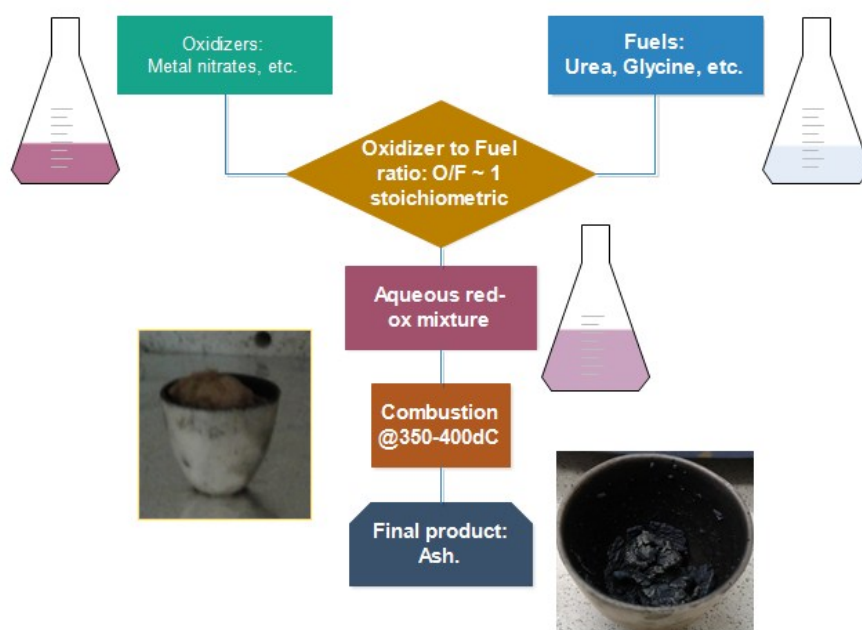

Figure S2. Simple, fast and straightforward (general) procedure to synthesize nano-structured oxides using solution combustion synthesis (SCS).

## **S2. Experimental**

### ***S2.1. Synthesis of iridium oxide by SCS***

In general, to synthesize iridium oxide by SCS, initially, iridium chloride ( $\text{IrCl}_3 \cdot x \cdot \text{H}_2\text{O}$ , 99%, Precious Metal Online (PMO), Australia), ammonium nitrate ( $\text{NH}_4 \cdot \text{NO}_3$ , Alfa Aesar, 95%), aluminum nitrate non-hydrate ( $\text{Al}(\text{NO}_3)_3 \cdot 9 \cdot \text{H}_2\text{O}$ , 98%, Fluka Analytic) and glycine ( $\text{C}_2\text{H}_5\text{NO}_2$ , 99.5%, Alfa Aesar) were separately dissolved in distilled deionized water using magnetic stirrer for at least 30 minutes. The desired precursor solution with a predetermined molar proportion of components is then mixed by stirring for 30 minutes. The solution is then transferred to an alumina crucible and placed on hot-plate kept at 80 °C with continuously stirring till the solution turned into a viscous gel. The alumina crucible with

viscous-gel is then moved to a muffle-furnace, preheated at 400°C, and kept for 2 h. After this heat treatment, the final product in the form of black foam/ash was collected and characterized/tested, without any post-treatments or washing.

Table S1. Various molar proportion of precursor composition for the synthesis of iridium oxide using SCS and their respective sample IDs. Here, M are moles of iridium chloride (IrCl<sub>3</sub>), O1 are moles of ammonium nitrate, O2 are moles of aluminum nitrate and F are moles of glycine. ## is series designation. The ✓ and ↖ signifies limit for fine molar variation in IrAlG series, where iridium chloride molarity was kept fixed to one and molar proportion of ‘stoichiometric oxidizer-fuel mix’ was varied between 1 to 2 with step of 0.2. The sample IrAlG1 ≡ IrAlG10 and IrAlG2 ≡ IrAlG20 (same symbol) but with different IDs for sake of continuity in variation of proportion and their analysis. Similarly, the samples IrAlG14 and IrAl14G23 are the same (↔, same symbol) but with different IDs (IrAlG1.4 = (1 x Ir) + 1.4 x (1 x oxidizer + 1.66 x fuel) = IrAl14G23). Direction arrows show the direction of variation of molar proportion with reference to an optimized sample, by earlier series. Explanation on optimization criteria is mentioned in section S3.2.

| Sample ID   | M                                                | X x[   | O1  | O2  | F    | ]   | ##                                                                                                                     |
|-------------|--------------------------------------------------|--------|-----|-----|------|-----|------------------------------------------------------------------------------------------------------------------------|
| IrG1        | 1                                                | 1 x[   | ... | ... | 1    | ]   | IrG                                                                                                                    |
| IrG2        | 1                                                | 2 x[   | ... | ... | 1    | ]   |                                                                                                                        |
| IrG3        | 1                                                | 3 x[   | ... | ... | 1    | ]   |                                                                                                                        |
| IrG4        | 1                                                | 4 x[   | ... | ... | 1    | ]   |                                                                                                                        |
| IrAmG1      | Fixed Stoichiometric oxidizer to fuel (OF) ratio | 1 x[   | 1   | ... | 0.2  | ]   | IrAmG                                                                                                                  |
| IrAmG2      |                                                  | 2 x[   | 1   | ... | 0.2  | ]   |                                                                                                                        |
| IrAmG3      |                                                  | 3 x[   | 1   | ... | 0.2  | ]   |                                                                                                                        |
| IrAmG4      |                                                  | 4 x[   | 1   | ... | 0.2  | ]   |                                                                                                                        |
| IrAlG1 ✓    | 1                                                | 1 x[   | ... | 1   | 1.66 | ]   | IrAlG ..... IrAlG <sub>y</sub> ..... IrAl <sub>x</sub> G <sub>y</sub> ..... IrAl <sub>x</sub> G <sub>y</sub> (= IrAlG) |
| IrAlG2 ↖    | 1                                                | 2 x[   | ... | 1   | 1.66 | ]   |                                                                                                                        |
| IrAlG3      | 1                                                | 3 x[   | ... | 1   | 1.66 | ]   |                                                                                                                        |
| IrAlG4      | 1                                                | 4 x[   | ... | 1   | 1.66 | ]   |                                                                                                                        |
| ✓ IrAlG10   | 1                                                | 1.0 x[ | ... | 1   | 1.66 | ]   |                                                                                                                        |
| ↓ IrAlG12   | 1                                                | 1.2 x[ | ... | 1   | 1.66 | ]   |                                                                                                                        |
| ↔ IrAlG14   | 1                                                | 1.4 x[ | ... | 1   | 1.66 | ]   |                                                                                                                        |
| ↑ IrAlG16   | 1                                                | 1.6 x[ | ... | 1   | 1.66 | ]   |                                                                                                                        |
| ↑ IrAlG18   | 1                                                | 1.8 x[ | ... | 1   | 1.66 | ]   |                                                                                                                        |
| ↖ IrAlG2.0  | 1                                                | 2.0 x[ | ... | 1   | 1.66 | ]   |                                                                                                                        |
| ↑ IrAl14G10 | 1                                                | ...    | ... | 1.4 | 1.00 | ... |                                                                                                                        |
| ↑ IrAl14G20 | 1                                                | ...    | ... | 1.4 | 2.00 | ... |                                                                                                                        |
| ↔ IrAl14G23 | 1                                                | ...    | ... | 1.4 | 2.32 | ... |                                                                                                                        |
| ↓ IrAl14G25 | 1                                                | ...    | ... | 1.4 | 2.50 | ... |                                                                                                                        |
| ↓ IrAl14G30 | 1                                                | ...    | ... | 1.4 | 3.00 | ... |                                                                                                                        |
| ↓ IrAl14G35 | 1                                                | ...    | ... | 1.4 | 3.50 | ... |                                                                                                                        |
| (= IrAlG)   |                                                  |        |     |     |      |     |                                                                                                                        |

Three types of precursor compositions were investigated: (i) IrCl<sub>3</sub> mixed with glycine in different molar proportion (IrG series), (ii) IrCl<sub>3</sub> mixed with mix of ammonium nitrate and glycine in different molar proportion (IrAmG series) and finally (iii) IrCl<sub>3</sub> mixed with mix of aluminum nitrate and glycine in different molar proportion (IrAlG series). The oxidizer (ammonium/aluminum nitrate) and fuel (glycine) were always mixed in stoichiometric proportion. However, in case of IrAlG series, for phase pure final product the variation between oxidizer (aluminum nitrate) and fuel was varied beyond the stoichiometric proportion. Various SCSed samples were labelled according to proportion of precursor composition. For example, the sample prepared with iridium chloride and glycine in 1:4 proportion is named as IrG4, the sample prepared with iridium chloride and ‘stoichiometric oxidizer-fuel mix’ in 1:1 (or 1:1.4) proportion for ammonium nitrate (or aluminum nitrate) oxidizer is named as IrAmG1 (or IrAlG14), sample prepared with iridium chloride, aluminum nitrate and glycine (non-stoichiometric mix) in 1:1.4:2.0 is named as IrAl14G20 and so on. Sample IDs assigned for various composition of precursor proportion is tabulated in Table S1.

### ***S2.2. Purely insulating alumina as support/matrix of electrocatalyst***

IrAlG series samples were expected to form IrO<sub>2</sub> supported on or incorporated in electrically insulating alumina. Usually, the support for electrocatalyst must have a good electrical conductivity and therefore, carbon, carbon nanotube or graphene are often used as supports for electrocatalyst. But, the highly acidic atmosphere and high applied potential in anode (IrO<sub>2</sub> catalyst side) compartment of PEM water electrolyzer easily corrode these carbon-based supports. Literature reveals that corrosion-resistant TiO<sub>2</sub>, SnO<sub>2</sub>, etc., which are electrically poor conductors, were often mixed with anode catalysts in PEM water electrolyzer for improving high surface utilization of catalyst, provided they are mixed in proportion well below the percolation-threshold.<sup>16</sup> The main-purpose of use of alumina as support was to improve the surface utilization of catalyst. Besides its precursor, aluminum nitrate, acted as source of nitrate in SCS.

### ***S2.3. Characterization of precursor composition and SC synthesized products***

SCS involves controlling the precursor composition (proportion of oxidizer and fuel) so that during the reaction a complete combustion would occur. This is basically achieved by balancing the oxidizing and reducing valance counts in the reactant mixture. However, in practice this ratio needs to be optimized by trial-and-errors, as many energy-losses during reaction are unaccounted in valance-balance calculations. Apart from these basic optimization strategy, in present investigation, the metal precursor is iridium chloride which is considered neutral or inadequate to provide oxidizing valance counts to proceed the SCS exothermally and therefore here an additive in the form nitrate to provide oxidizing valance counts for SCS were supplied. Effect of these additives were investigated by characterizing the precursors and their mixtures using thermo-gravimetric/differential-thermal analysis (TG-DTA, Thermogravimetric balance, Model TGA/SDTA851, Mettler Toledo). Prior to TG-DTA, the aqueous precursors or their mixtures were evaporated on hotplate till viscous gel is formed (gelation-step). These dried viscous-gel type samples were then analyzed by TG-DTA.

The SCSed products for all precursor compositions (proportions) were then characterized by X-ray diffraction (X-ray Powder Diffractometer, D8 Advance, Bruker Instruments). The X-ray diffraction (XRD) patterns were further analyzed to extract the crystallite sizes. To estimate the amount different phases i.e. the amount of iridium oxide and iridium in SCSed sample was quantified by processing the XRD patterns using Rietveld refinement technique. The samples which showed ~100% iridium oxide in as-SCSed product are considered as “phase-pure SCSed iridium oxide”. The phase pure SCSed iridium oxide samples were then further characterized for surface morphology and surface area using SEM (scanning electron microscope, SEM, Quanta 650 FEG, FEI)/TEM (transmission electron microscope,

model 1011, JEOL) and BET (Brunauer–Emmett–Teller, autosorb iQ, Quantachrome Instruments) isotherm technique, respectively. These phase pure SCSed materials were further used as anode catalyst in membrane electrode assemblies (MEAs) and characterized in an in-house designed electrolyzer.

#### S2.4. MEA fabrication using SCSed products and their testing in electrolyzers

The schematic of MEA fabrication and electrolyzer assembly is shown in Figure S3. For fabrication of the catalyst-coated-membranes (CCMs), the phase-pure SCSed iridium oxide powders as anode catalyst and 40wt% Pt supported on carbon (platinum on graphitized carbon, 40wt% loading, Sigma Aldrich) as cathode catalyst were spray-coated on preheated (at 80 °C) Nafion® membrane (Nafion® N-115 membrane, 0.125mm thick, Alfa Aesar). Spray-coating was carried out using hand-held airbrush (Airbrush, Vulcano, Ventus). The ink for spray-coating consists of catalyst, Nafion® ionomer (Nafion® perfluorinated resin solution - 5 wt%, Sigma Aldrich) and isopropanol (2-propanol, Scharlau) as solvent. For each MEA, anode and cathode catalyst loading was kept fixed at 2 mg/cm<sup>2</sup> and 0.6 mg/cm<sup>2</sup>, respectively. Amount of Nafion® ionomer was also kept fixed for either catalyst inks and was 30 wt% of metal/metal-oxide catalyst loadings. All the CCMs were prepared in square shape with an active area of 4 cm<sup>2</sup>. These square shaped CCMs were then sandwiched between two titanium microporous gas-diffusion-layers (GDLs, BEKIPOR® Titanium-2 GDL 28 - 0.7, Bekaert Fibre Technologies) and hot-pressed at 135 °C for 3 min to obtain MEAs. These MEAs were then assembled in an electrolyzer-hardware, for water electrolysis evaluation. Additionally, the performance of MEA is usually suppressed by a potential drop ( $V_{IR} = IR = \text{current} \times \text{resistance}$ ) due to the resistance of cell components and becomes noticeably high at higher current/current density. To account for such contributions, the curves were IR corrected (i.e.  $V_{\text{actually applied}} = V_{\text{applied}} - V_{IR}$ ).

The assembled electrolyzer was then evaluated for electrolysis performance using polarization curves, in which a voltage potential was applied to electrolyzer and respective current is measured. The applied potentials were varied from 1.2 to 2.2 volts. Application of electrical potential, acquisition of current, and data recording was performed using a LabVIEW (National Instruments, LabVIEW 2015) based application by controlling a digital DC power-supply (Aim and Thurlby Thandar Instruments, CPX400DP, 420 watt). Preheated (80° C) mili-Q water was supplied at anode inlet of electrolyzer-hardware at fixed flow rate of 0.5 ml/min. The electrolyzer cell was operated at 80°C. The generated hydrogen was collected and quantified to confirm that there is no side-reaction in electrolyzer.

Furthermore, for a comparison, a commercial CCM (Electrolyzer CCM, FuelCellEtc®, USA) were also evaluated. The CCM had IrRuO<sub>x</sub> and Pt as anode and cathode catalyst, respectively with catalyst loading of 3mg/cm<sup>2</sup>.

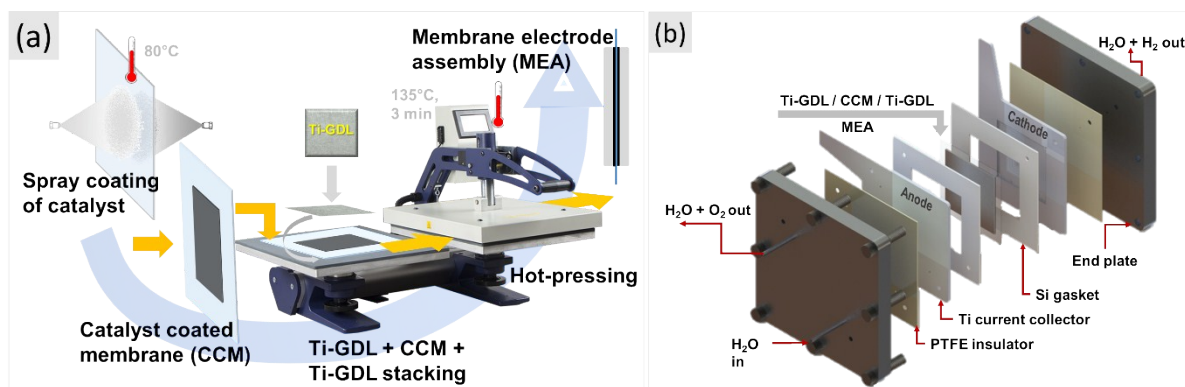

Figure S3. Schematic for (a) MEA fabrication and (b) electrolyzer assembly.

### S3. Results and discussion

#### S3.1. Thermal behavior of precursors used for SCS

Two kinds of nitrate as oxidizer/nitrate-additive for SCS were employed, namely, ammonium nitrate and aluminum nitrate. The iridium chloride (metal precursor) and glycine were mixed in presence/absence of these nitrates and were investigated for their thermal behavior. Figure S4 shows the TGA profiles of viscous-gel, obtained by gelation step (Section S2.1), of precursors and their mixtures. For the sake of simplicity, TGA profiles can be grouped in three groups: (I) TGA of precursors (Figure S4, a–d, solid curves), (II) TGA of nitrate and glycine in stoichiometric proportion (Figure S4, e–f; dashed curves) and (III) TGA of mixture of metal precursor and glycine (fuel) with/without oxidizer. Figure S4, g–i; dotted curves).

Up to 550°C, glycine (Figure S4-b) does not decompose (weight loss) neither completely nor to a stable-weight while iridium chloride (Figure S4, a) show a weight loss of only ~10%. However, nitrate precursors (Figure S4, c, d) decomposes completely or to a stable weight loss at temperatures less than 400 °C. Ammonium nitrate (Figure S4, c) completely decomposes without any residue and can be used as residue-free oxidizer in SCS to supply additional nitrate-groups for SC reactions. This was not the case for aluminum nitrate.

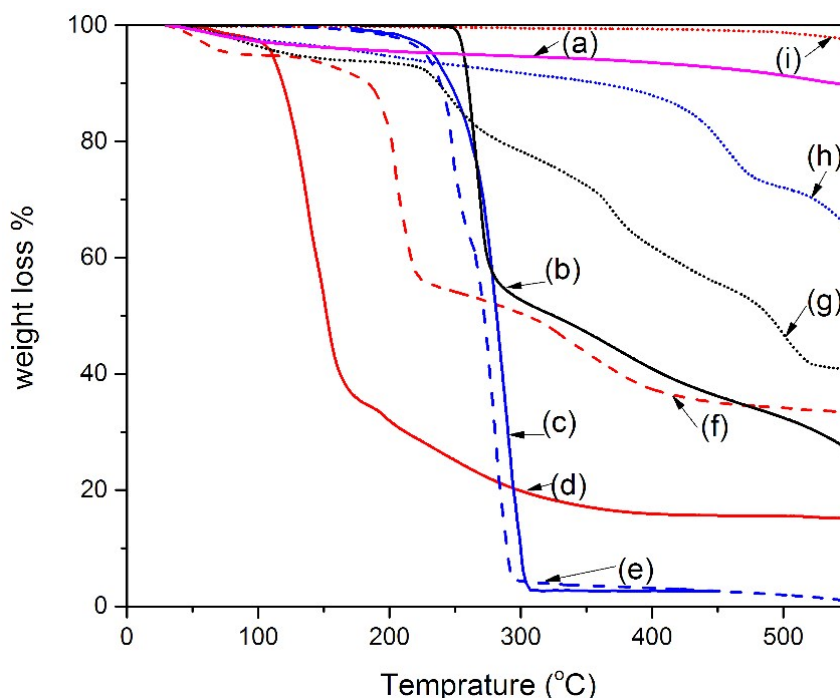

Figure S4. TGA of precursors and their mixtures, (a) iridium chloride, (b) glycine, (c) ammonium nitrate, (d) aluminum nitrate, (e) ammonium nitrate and glycine (1:0.2 = stoichiometric ratio), (f) aluminum nitrate and glycine (1:1.66 = stoichiometric ratio), (g) iridium chloride and glycine (1:1 molar proportion), (h) iridium chloride, ammonium nitrate and glycine (1: 1 x (1:0.2) = molar proportion with stoichiometric oxidizer/fuel mix) and (i) iridium chloride, aluminum nitrate and glycine (1: 1 x (1:1.66) = molar proportion with stoichiometric oxidizer/fuel mix).

TGA of nitrate mixed with glycine in stoichiometric proportion for their combustion is shown by the curves (e) and (f) in Figure S4 (dashed curves). Nitrates complexing with glycine resulted in improved thermal decomposition of nitrates. In case of ammonium nitrate (Figure S4, e), the complete and sharp

decomposition onset point was seen at temperature lower than that of observed for un-mixed ammonium nitrate. For the aluminum nitrate case, the onset of decomposition was delayed and also resulted in relatively high-residue than that of observed for only aluminum nitrate. The residual-weight fraction of 33.83% ( $\pm 3\%$ ) equals to aluminum (III) oxide weight fraction, which is SCSed upon combustion of stoichiometric mixture of aluminum nitrate and glycine (Figure S4, f). If we consider molecular weight (MW) of reactants (aluminum nitrate + 1.6 Glycine = 337.60 MW) as 100% and use MW of  $\text{Al}_2\text{O}_3$  (= 101.96 i.e. 30.20% of reactants) then the remaining residue ( $\pm 3\%$ ) upon SCS can be assigned to  $\text{Al}_2\text{O}_3$ . However, this can be considered as rough estimate/assignment.

TGA of iridium chloride mixed with glycine or with glycine and nitrate for their combustion is shown as curves (g), (h) and (i) in Figure S4 (dotted curves). These curves showed continuous weight loss with temperature. It might be due to the fact that the temperature ramp rate of TGA was set to  $10\text{ }^\circ\text{C}/\text{min}$  and the SCS was not completed in the given time span. However, in case of curve (i) in Figure S4, little and negligible weight loss was observed and attributed to the high exothermicity of reaction which occurred during gelation of this mixture and resulted in final product during gelation-step itself.

The effect of additives was clearly observed in their differential thermal analysis (DTA) curves (Figure S5). In case of oxidizer-fuel-mix (Figure S5, a, b) the exothermicity of reaction was highest while for the mixtures of metal precursors and fuel (Figure S5, c) and/or fuel-oxidizer-mix (Figure S5, d, e), was either multi-stage or relatively less. DTA of metal precursor mixed with glycine reveals multiple peaks, suggesting more than one distinct reactions. As oxide formation in SCS is generally occurs due to generated heat during reaction and therefore to obtain a phase-pure oxide of iridium in as-SCSed form, a systematic variation in mixing proportion was necessary to be designed (Table S1).

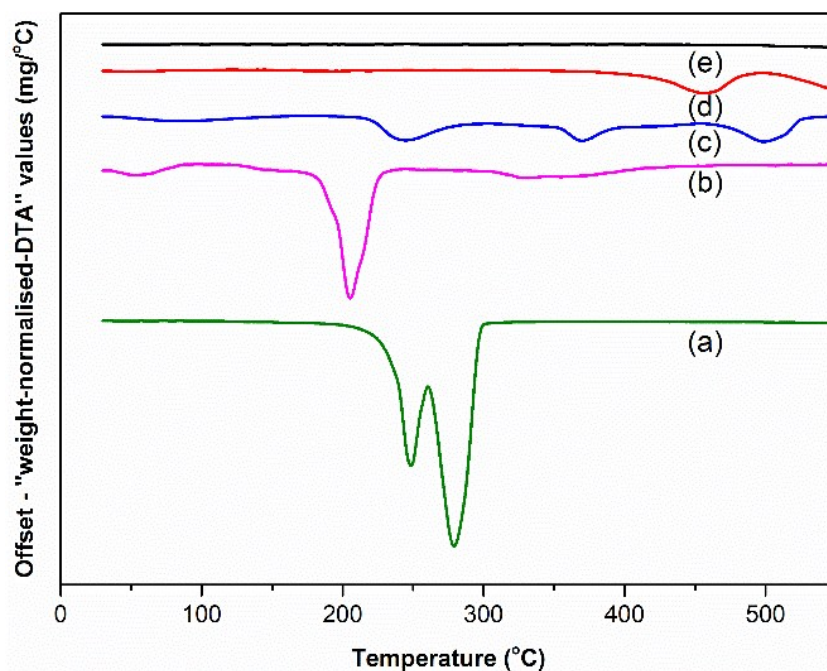

Figure S5. Weight-normalized-DTA\* profiles of mixtures of precursors, (a) ammonium nitrate and glycine (1:0.2 = stoichiometric ratio), (b) aluminum nitrate and glycine (1:1.66 = stoichiometric ratio), (c) iridium chloride and glycine (1:1 molar proportion), (d) iridium chloride, ammonium nitrate and glycine (1: 1 x (1:0.2) = molar proportion with stoichiometric oxidizer/fuel mix) and (e) iridium chloride, aluminum nitrate and glycine (1: 1 x (1:1.66) = molar proportion with stoichiometric oxidizer/fuel mix). \*Weight-normalized-DTA = DTA-values  $\div$  total weight of sample under-investigation.



### S3.2. Effect of variation of mixing-proportion of precursors on phase of SCSed products

The XRD patterns of the SCSed samples prepared with varied proportion of precursors (Table S1)) is shown in Figure S6. All of the peaks in every XRD pattern of SCSed samples were matched with peaks corresponding to either IrO<sub>2</sub> or metallic Ir, coinciding with the vertical lines (Figure S6) drawn referencing to the peak positions of commercial IrO<sub>2</sub> and of commercial Ir nano-powder. The amount of phases in these XRD patterns were estimated using the Rietveld refinement technique. The crystallography information file (CIF) of IrO<sub>2</sub> and Ir for these Rietveld refinements were retrieved from crystallography open database (COD)<sup>23,24</sup>. COD reference code for tetragonal IrO<sub>2</sub> and cubic Ir are ‘96-210-1855’ (COD ID: 2101855) and ‘96-900-8471’ (COD ID: 9008471), respectively.

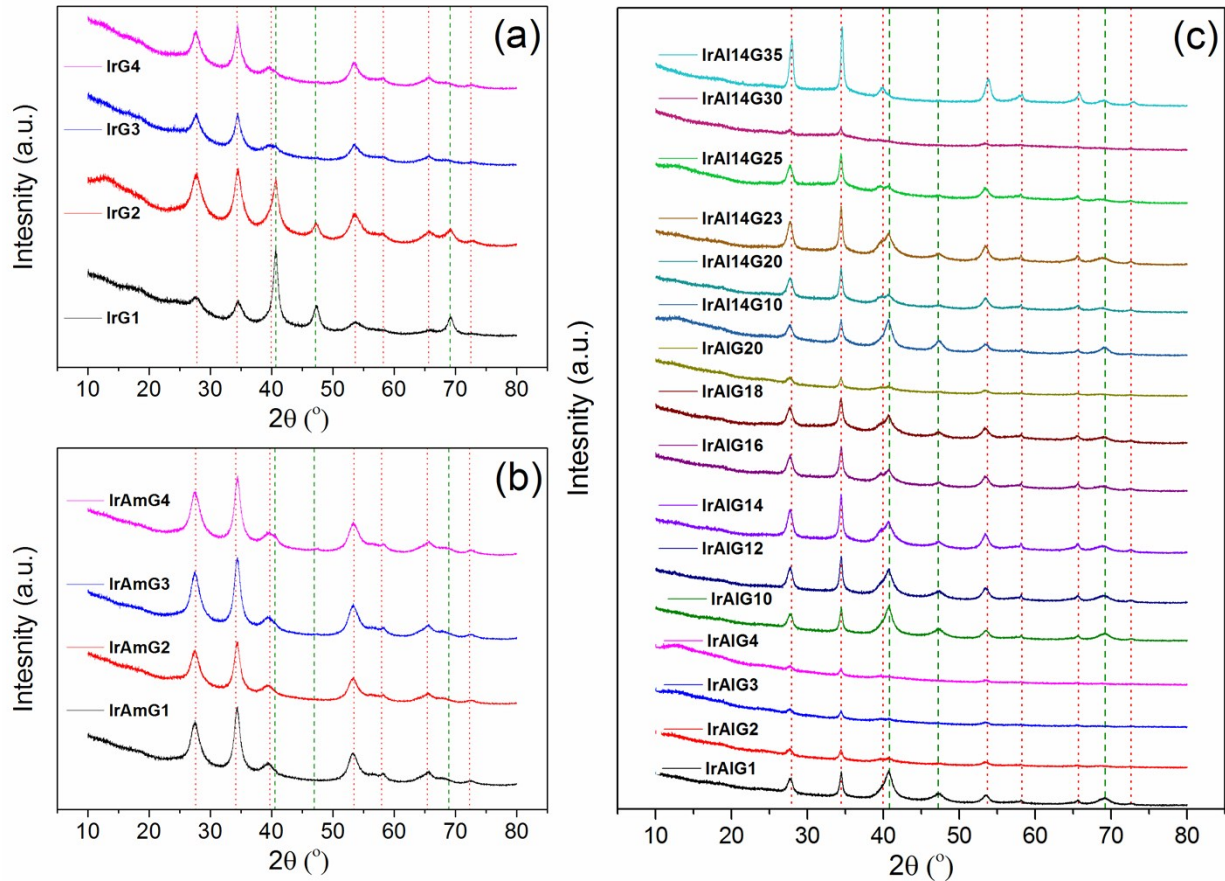

Figure S6. XRD patterns of SCSed powders: (a) IrG, (b) IrAmG and (c) IrAlG series. Details of sample IDs and the mixing proportion of precursors used to synthesize those samples are shown in Table S1. Vertical lines in these plots correspond to peak positions of commercial IrO<sub>2</sub> (red – dotted line; ·····) and of Ir-black (green – dashed line; -----) powders.

Figure S7 shows a typical Rietveld refined profile (of IrAmG4), estimated phase percentage of iridium/iridium-oxide for each of SCSed samples and their crystallite sizes. The amount iridium oxide in SCSed products (Figure S7, b) varied linearly with the amount of fuel for IrG series and with amount of stoichiometric oxidizer-fuel (OF) mix for IrAmG series. In IrG series the amount of iridium oxide increased with increased molar proportion of fuel while in IrAmG series the amount of iridium oxide decreased with increased molar proportion of stoichiometric oxidizer-fuel (OF) mix. In the earlier case, the increased proportion of fuel generated relatively higher heat producing higher amount of iridium

oxide phase in SCSed products. The higher the molar proportion of stoichiometric OF mix with the same amount of iridium precursor, the higher amount of evolving gases (as ammonium nitrate decomposes totally). This may have caused an inefficient heat transfer to metal precursor, leading to decreased amount of iridium oxide in the final product.

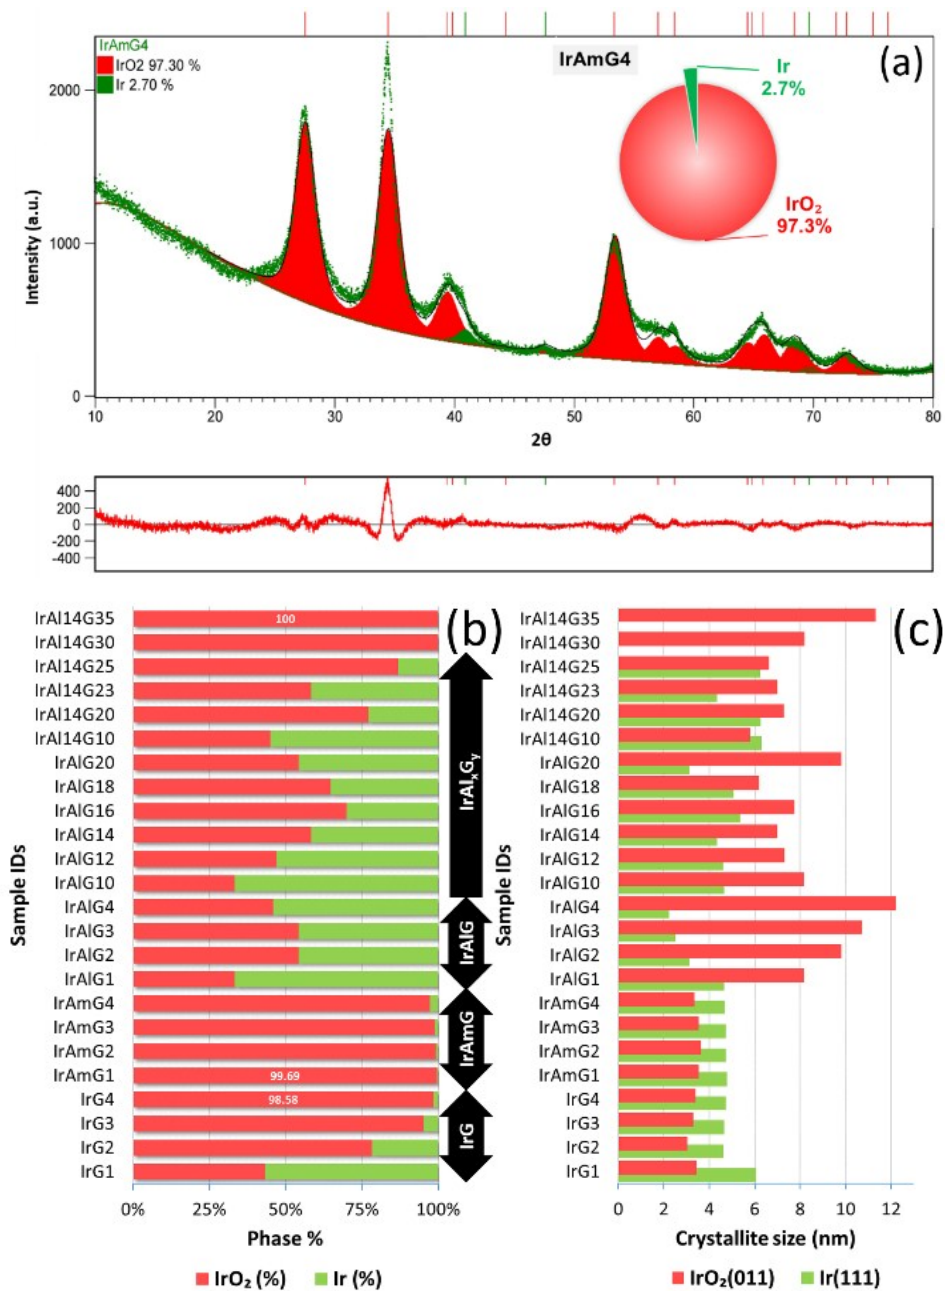

Figure S7. Results of Rietveld refinement performed on the XRD patterns of all SCSed samples. (a) Typical Rietveld refinement fitting with difference plot and estimated phase percentage for IrAmG4 sample. Estimated (b) phase % and (c) crystallite size (nm) from the analysis fitting of XRD patterns of various SCSed samples. Details of sample IDs and the mixing proportion of precursors used to synthesize those samples are show in Table S1.

For IrAlG series, a volcano-shape change in the amount of iridium oxide with the stoichiometric OF mix was observed (Figure S7, b). Fraction of iridium oxide was similar in the final products for 1:2 (IrAlG2 – 54.37% IrO<sub>2</sub>) and 1:3 (IrAlG3 – 54.34% IrO<sub>2</sub>) molar proportion of iridium chloride and stoichiometric mix of aluminum nitrate with glycine. As per the precursor mixtures in IrAlG series, upon combustion, formation of two oxides (i.e. Al<sub>2</sub>O<sub>3</sub> and IrO<sub>2</sub>) was expected and the energy released during SCS is not enough for in-situ formation two oxides. Therefore, excess energy was provided by incorporating higher amount of fuel in precursor composition to obtain a phase pure iridium oxide on in-situ formed alumina support. Firstly, we fine-tuned the molar ratio of iridium chloride and stoichiometric oxidizer-fuel (OF) mix for IrAlG series between 1:1 and 1:2 ratios and checked for a minimal amount of stoichiometric OF mix required for clear indication of shoulder peak of iridium oxide ( $2\theta = 39.57^\circ$ ) in their XRD patterns. It was observed at 1:1.4 molar proportion. For further variation, the proportion of iridium chloride to aluminum nitrate was fixed to 1: 1.4 and molar proportion of glycine varied till a phase pure iridium oxide as SCSed product was obtained.

The estimated crystallite sizes of iridium oxide phase for all SCSed samples were in the range from 3.5 to 12 nm (Figure S7, c). A general trend of increase in crystallite size with higher amount of glycine (fuel) or stoichiometric OF mixes was observed, except for IrAmG series. In case of IrAmG series, the crystallite size is decreased with increased molar proportion of stoichiometric OF mix, which can be attributed to the inefficient heat transfer to iridium precursor, hampering further crystallite growth.

### S3.3. Amorphous $\gamma$ -alumina as support/matrix in IrAlG sample

Aluminum nitrate and glycine mix upon SC forms alumina according to the TGA (Section S3.1); however, the alumina peaks are not clearly visible (very broad) in the XRD pattern of IrAlG sample. Therefore, these observations indirectly suggest the formation of highly amorphous alumina (residue) during SCS has been achieved. To affirm this assumption, Raman spectra of blank support sample, i.e. AlG, was compared with Raman spectra of commercial  $\alpha$ - and  $\gamma$ -alumina. The peaks in Raman spectra of AlG matches well with that of observed for commercial  $\gamma$ -alumina sample (Figure S8), suggesting the presence of  $\gamma$ -alumina in the blank support (AlG).

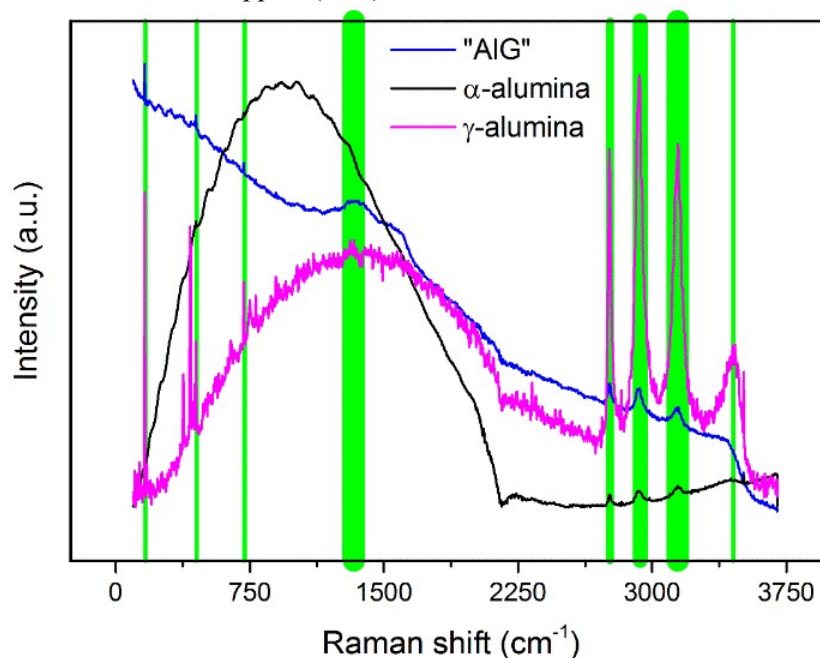

Figure S8. Raman spectra of blank support sample AlG, comparing with Raman spectra of commercial  $\alpha$ - and  $\gamma$ -alumina.

### S3.4. Surface morphology of phase pure SCSed iridium oxide

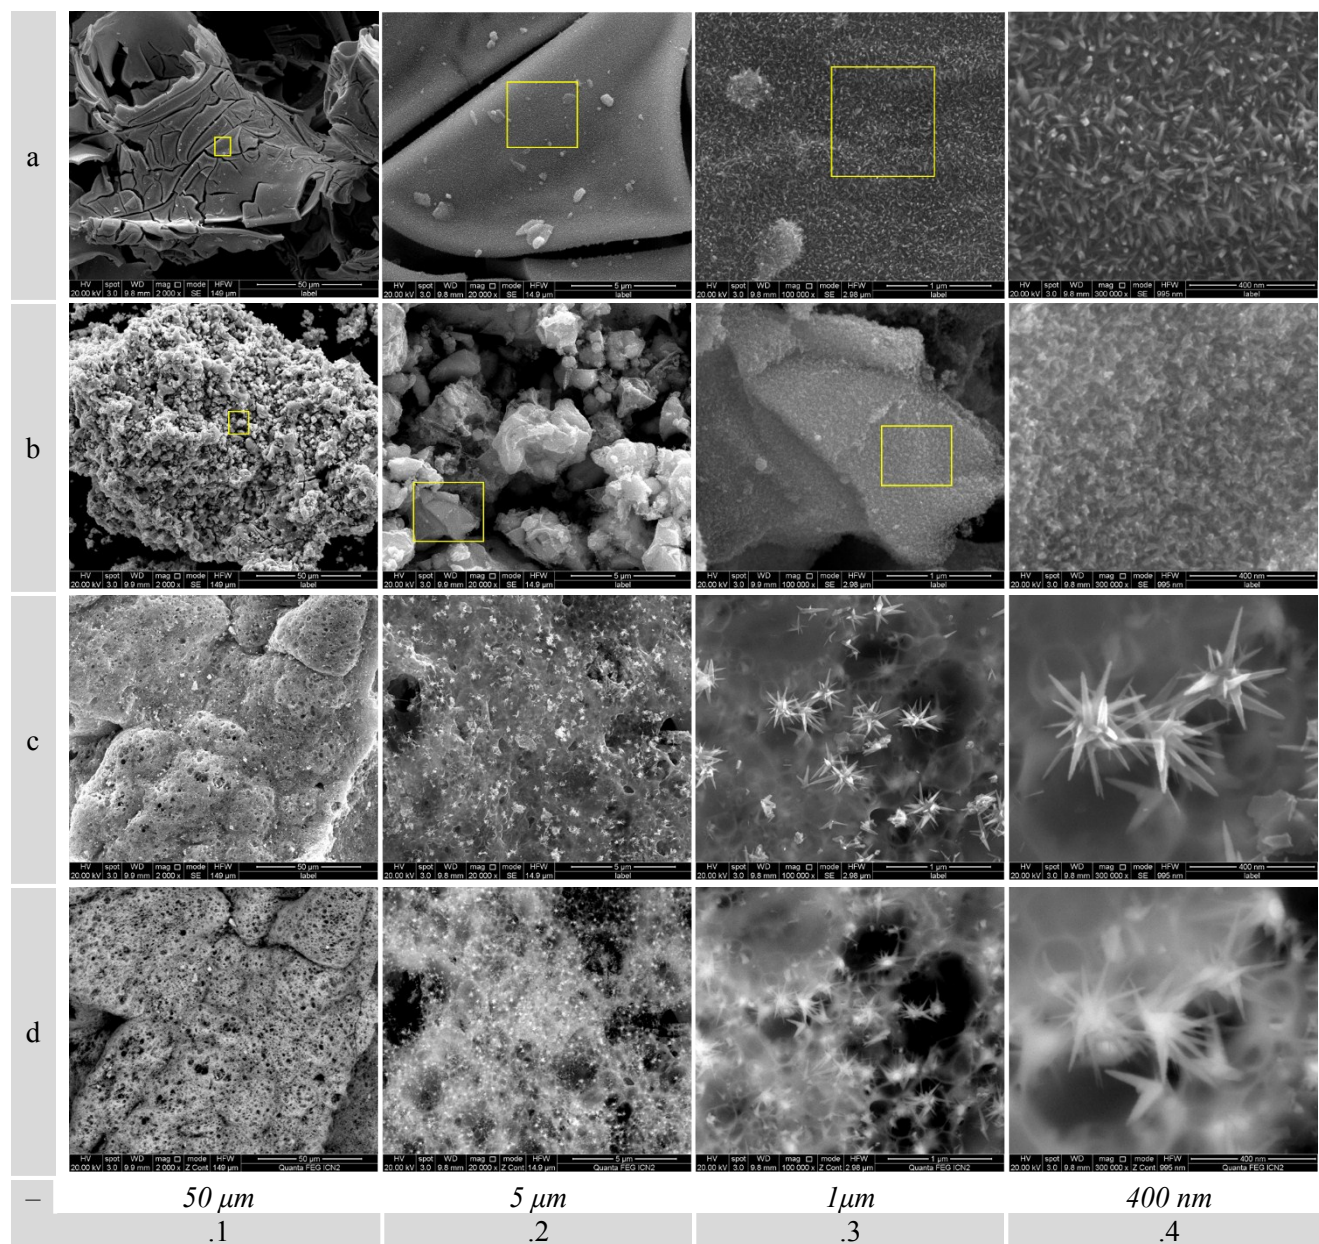

Figure S9. SEM of SCSed phase-pure iridium oxide, (a.1 – a.4) IrG4, (b.1 – b.4) IrAmG1 and (c.1 – c.4) IrAlG sample in the normal-mode (image by secondary electron). SEM image of (d.1 – d.4) IrAlG sample in the back-scattered electron mode is also shown and was taken at same area as that of taken for (c.1 – c.4).

### S3.5. Elemental composition of phase pure SCSed iridium oxide

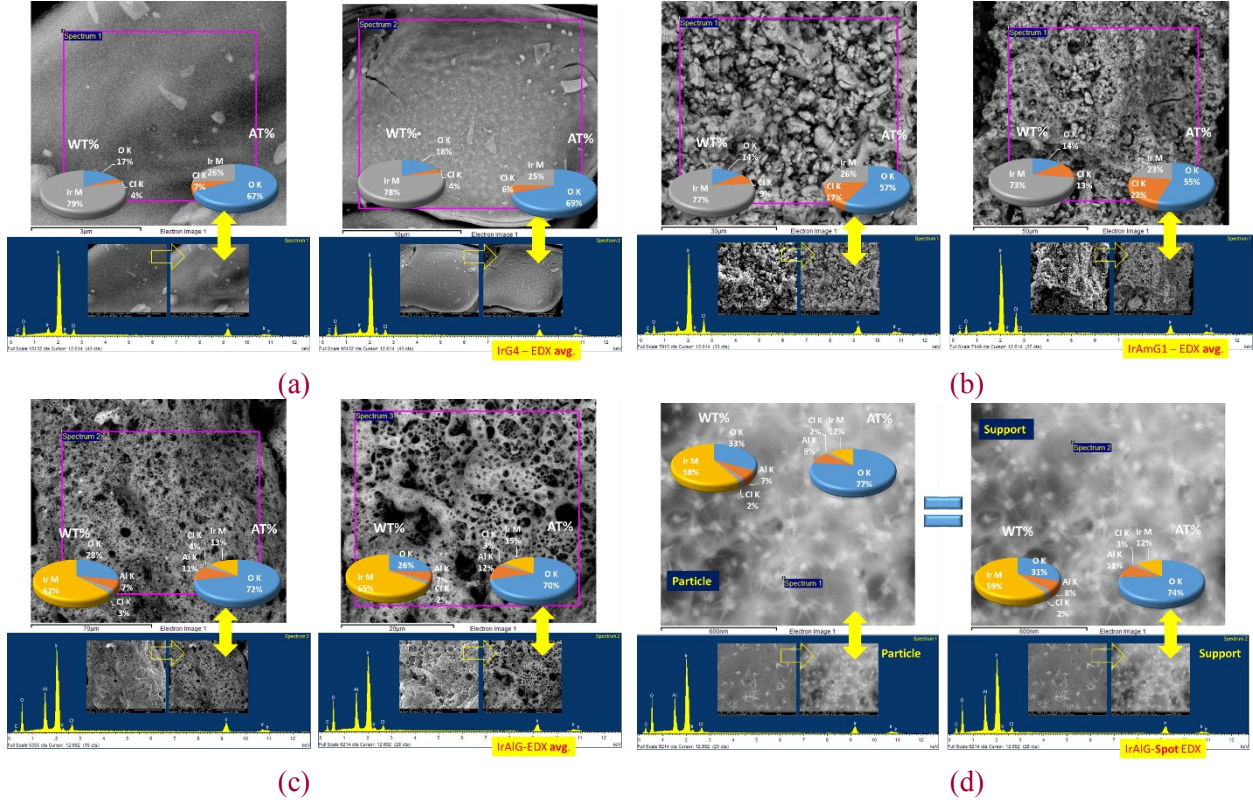

Figure S10. EDX patterns obtained at two regions of SCSed phase pure iridium oxide, (a) IrG4, (b) IrAmG1 and (c) IrAlG. (d) Spot EDX pattern obtained at needle shaped particles and particle-less area (apparently only support/matrix region) of IrAlG. Inset in each EDX pattern is the SEM image of same region (in the SE and BSE modes) for which the EDX pattern was obtained. Spot-EDX measurement reveals almost the same element-quantification for particle and support/matrix, suggesting that the identified support (from BSE image) in fact also contains iridium oxide particles hidden below the surface observed in BSE image. Furthermore, due to large difference in atomic number of two elements (Ir and Al) and intimate mixture of alumina and iridium oxide at sub-micron level, the adequate signal contrast/resolution for elemental mapping in SEM-EDX was not possible.

### S3.6. Textural properties of phase pure SCSed iridium oxide and commercial Ir nano-powder

Table S2. Textural properties obtained from the BET isotherms of phase pure SCSed iridium oxide (IrG4, IrAmG1 and IrAlG) and commercial Ir nano-powder.

|          | External surface area (m <sup>2</sup> /g) | Micro-pore area (m <sup>2</sup> /g) | Surface Area (m <sup>2</sup> /g) | Average pore diameter (nm) | Total pore volume (cm <sup>3</sup> /g) |
|----------|-------------------------------------------|-------------------------------------|----------------------------------|----------------------------|----------------------------------------|
|          | [a]                                       | [b]                                 | [c = a + b]                      |                            |                                        |
| IrG4     | 89                                        | -                                   | 89                               | 5.4                        | 0.12                                   |
| IrAmG1   | 80                                        | -                                   | 80                               | 10.1                       | 0.20                                   |
| IrAlG    | 45                                        | 86                                  | 131                              | 4.6                        | 1.53                                   |
| Comm. Ir | 52                                        | -                                   | 52                               | 8.8                        | 0.12                                   |

### S3.7. Analysis of HR-TEM of IrAlG sample

To extract the structural features in TEM images and their analysis (Figure S11), “ImageJ” (public domain open source software, version 1.50i) software was employed. Firstly, the images to analyze were calibrated for their scale by set scale command in ImageJ, where we proportionate the digital pixels to real world scale, i.e. nm,  $\mu\text{m}$ , etc. Later the image was further processed geometrically or for FFT. The FFT processing of the region in image allowed to estimate the periodicity in the image (bright spots, except center point), here the lattice planes. Those bright spots were then marked using multipoint tool of ImageJ and was further analyzed to estimate various lattice plane distances ( $d$ -spacing).

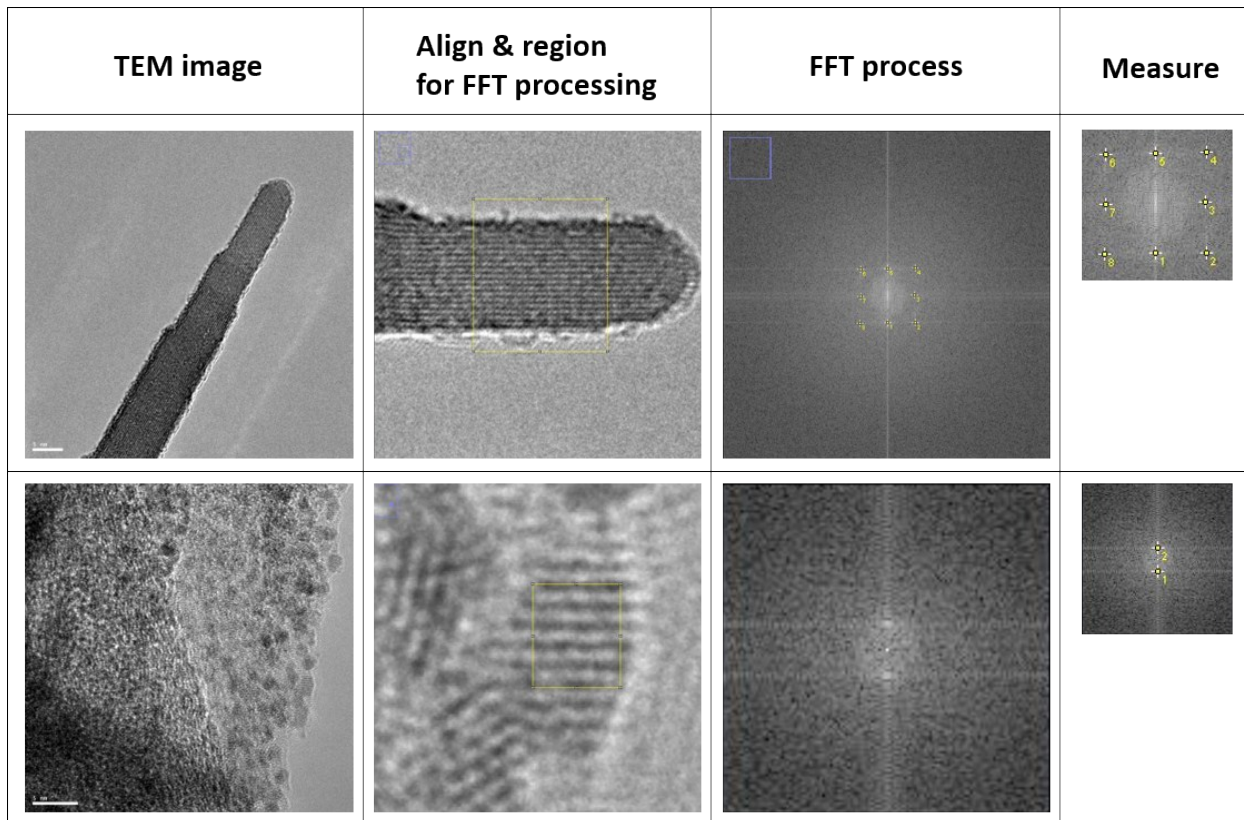

Figure S11. Analysis of TEM image of IrAlG sample. From left to right, obtained intermediate images while FFT processing using ImageJ software for needle shape structures (upper row) and for fine-nano-crystallites seen in support (lower row).

The estimated  $d$ -spacing values for nano-needle structures and nano-crystallites embedded in the support/matrix along with  $d$ -spacing values for the reference pattern is shown in Table S3. When they are compared, it is clear that the  $d$ -spacing of the particles as well as nano-needle structures are well-matched with that of reference  $d$ -spacing values of  $\text{IrO}_2$  confirming the presence of  $\text{IrO}_2$  in the amorphous/low-crystallinity  $\text{Al}_2\text{O}_3$ . Apparently, the lattice planes of the needles seem of poly-crystalline nature, however, the most of the planes are oriented along (110) planes with  $d$ -spacing value of  $0.32 \pm 0.01$  nm.

Table S3. The d-spacing values (Å and nm) (a) for reference pattern of IrO<sub>2</sub>. The d-spacing values (nm) estimated at marked (enumerated) points on FFT processed image using ImageJ (b) for needle shape structures (upper row in Figure S11) and (c) for fine-nano-crystallites seen in support (lower row in Figure S11).

| <b>(a)</b>                         |       |       |        | <b>(b)</b>     |        |       | <b>(c)</b>       |        |       |
|------------------------------------|-------|-------|--------|----------------|--------|-------|------------------|--------|-------|
| <b>COD code: 96-210-1855 (IrO)</b> |       |       |        | <b>On rods</b> |        |       | <b>Particles</b> |        |       |
| 2θ (deg)                           | (hkl) | d (Å) | d (nm) | No.            | d (nm) | (hkl) | No.              | d (nm) | (hkl) |
| 27.99                              | (110) | 3.19  | 0.32   | 1              | 0.31   | (110) | 1                | 0.19   | (210) |
| 34.65                              | (101) | 2.59  | 0.26   | 2              | 0.22   | (111) | 2                | 0.27   | (101) |
| 40.00                              | (200) | 2.25  | 0.23   | 3              | 0.32   | (110) |                  |        |       |
| 40.17                              | (111) | 2.24  | 0.22   | 4              | 0.23   | (200) |                  |        |       |
| 44.96                              | (210) | 2.01  | 0.20   | 5              | 0.33   | (110) |                  |        |       |
| 53.93                              | (211) | 1.70  | 0.17   | 6              | 0.24   | (200) |                  |        |       |
| 57.85                              | (220) | 1.59  | 0.16   | 7              | 0.32   | (110) |                  |        |       |
| 58.38                              | (002) | 1.58  | 0.16   | 8              | 0.22   | (111) |                  |        |       |
| 65.46                              | (310) | 1.42  | 0.14   |                |        |       |                  |        |       |
| 65.59                              | (221) | 1.42  | 0.14   |                |        |       |                  |        |       |
| 65.96                              | (112) | 1.42  | 0.14   |                |        |       |                  |        |       |
| 69.22                              | (301) | 1.36  | 0.14   |                |        |       |                  |        |       |
| 72.76                              | (311) | 1.30  | 0.13   |                |        |       |                  |        |       |
| 73.12                              | (202) | 1.29  | 0.13   |                |        |       |                  |        |       |
| 76.12                              | (320) | 1.25  | 0.12   |                |        |       |                  |        |       |
| 76.59                              | (212) | 1.24  | 0.12   |                |        |       |                  |        |       |
| 83.06                              | (321) | 1.16  | 0.12   |                |        |       |                  |        |       |
| 86.31                              | (400) | 1.13  | 0.11   |                |        |       |                  |        |       |
| 86.76                              | (222) | 1.12  | 0.11   |                |        |       |                  |        |       |
| 89.66                              | (410) | 1.09  | 0.11   |                |        |       |                  |        |       |

### S3.8. TEM of phase pure SCSed iridium oxide and commercial Ir nano-powder

To evaluate the dispersibility of SCSed iridium oxide and commercial iridium nano-powder, they were ultra-sonicated in isopropanol (dispersant for spray-ink) for five minutes, drop-dried (for 10 min) on copper mesh and analyzed using TEM (Figure S12).

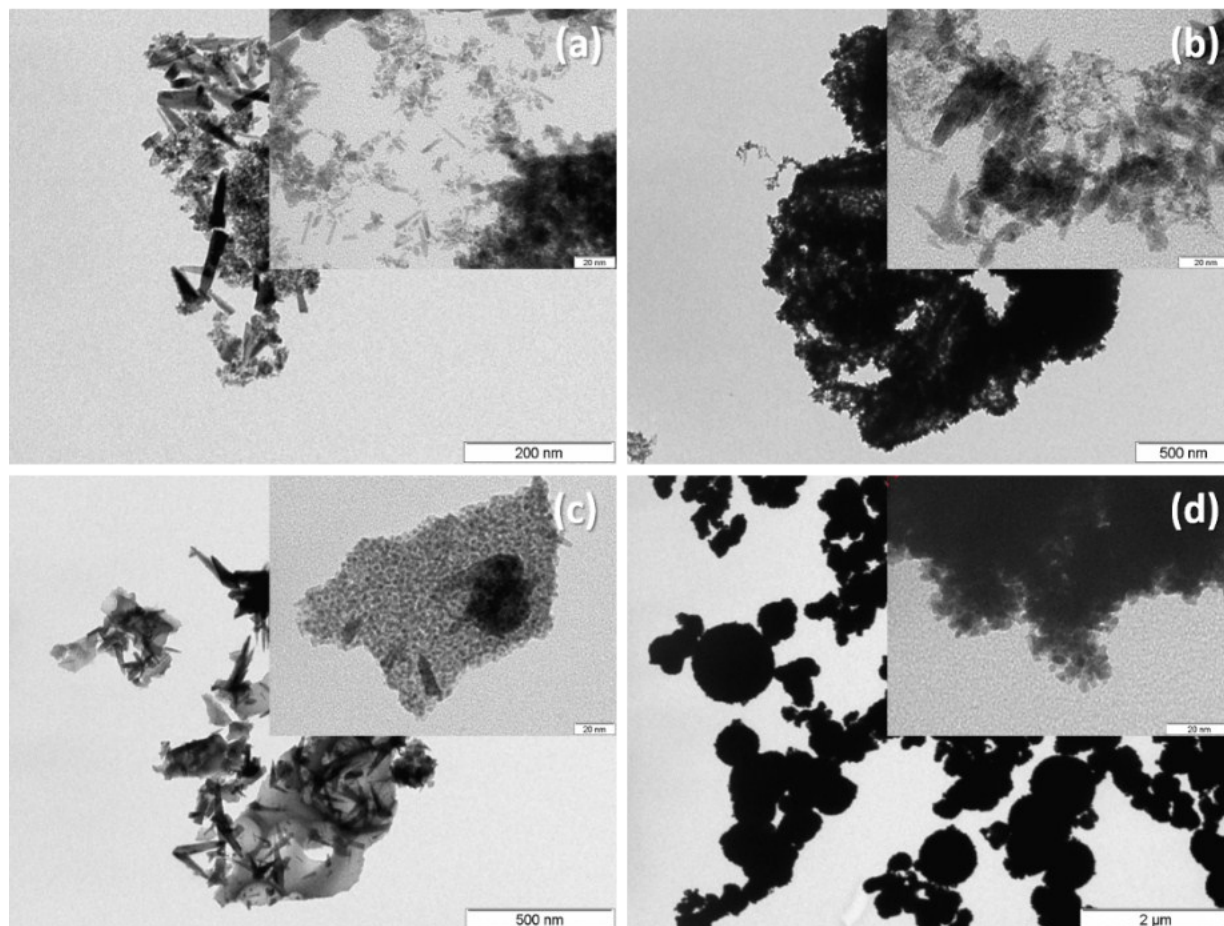

Figure S12. TEM of phase pure SCSed (a) IrG4 sample, (b) IrAmG1 sample and (c) IrAlG sample. For comparison, TEM of (d) commercial iridium nano-powder is also shown. The insets shown in each figure have the same scale-bar value (20 nm).



### S3.9. Stability of IrAlG under water electrolysis

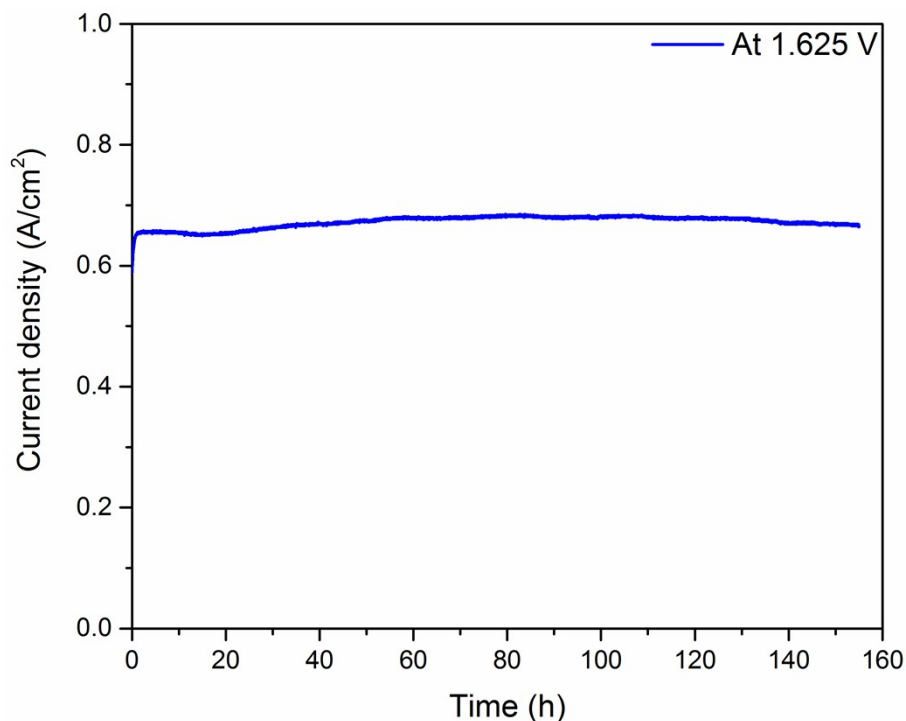

Figure S13. Stability test of IrAlG under PEM electrolysis.

The electrolyzer with IrAlG catalyst was operated to continuously work under a constant potential of 1.625 V for 160 h. At this potential, the electrolyzer was initially producing current density of 0.6 A cm<sup>-2</sup> which was raised to max. value of ca. 0.685 A cm<sup>-2</sup> after 60 h of operation. The value was remained stable for another 60 h and started to decay slightly. At the end of 160 h of operation the current density of electrolyzer was about 0.635 A cm<sup>-2</sup>, assuring the highly stable performance of IrAlG catalyst.

## S4. References

1. K. Zeng and D. Zhang, *Prog. Energy Combust. Sci.*, 2010, **36**, 307-326.
2. T. W. Chao, C. J. Liu, A. H. Hsieh, H. M. Chang, Y. S. Huang and D. S. Tsai, *Sensors and Actuators B: Chemical*, 2007, **122**, 95-100.
3. Y. Lee, M. Kang, J. H. Shim, N.-S. Lee, J. M. Baik, Y. Lee, C. Lee and M. H. Kim, *The Journal of Physical Chemistry C*, 2012, **116**, 18550-18556.
4. C. Zhao, H. Yu, Y. Li, X. Li, L. Ding and L. Fan, *J. Electroanal. Chem.*, 2013, **688**, 269-274.
5. B. C. Satishkumar, A. Govindaraj, M. Nath and C. N. R. Rao, *J. Mater. Chem.*, 2000, **10**, 2115-2119.
6. J. Tang, B. Kong, Y. Wang, M. Xu, Y. Wang, H. Wu and G. Zheng, *Nano Lett.*, 2013, **13**, 5350-5354.
7. A. Korotcov, H. P. Hsu, Y. S. Huang and D. S. Tsai, *JRSp*, 2006, **37**, 1411-1415.
8. J. Cheng, H. Zhang, H. Ma, H. Zhong and Y. Zou, *Electrochim. Acta*, 2010, **55**, 1855-1861.
9. J. C. Cruz, V. Baglio, S. Siracusano, R. Ornelas, L. Ortiz-Frade, L. G. Arriaga, V. Antonucci and A. S. Aricò, *J. Nanopart. Res.*, 2011, **13**, 1639-1646.

10. Y. Lee, J. Suntivich, K. J. May, E. E. Perry and Y. Shao-Horn, *The Journal of Physical Chemistry Letters*, 2012, **3**, 399-404.
11. R. Adams and R. L. Shriner, *J. Am. Chem. Soc.*, 1923, **45**, 2171-2179.
12. S. Song, H. Zhang, X. Ma, Z. Shao, R. T. Baker and B. Yi, *Int. J. Hydrogen Energy*, 2008, **33**, 4955-4961.
13. J. Cheng, H. Zhang, H. Ma, H. Zhong and Y. Zou, *Int. J. Hydrogen Energy*, 2009, **34**, 6609-6613.
14. J. Cheng, H. Zhang, G. Chen and Y. Zhang, *Electrochim. Acta*, 2009, **54**, 6250-6256.
15. T. A. F. Lassali, J. F. C. Boodts and L. O. S. Bulhões, *J. Non-Cryst. Solids*, 2000, **273**, 129-134.
16. A. Marshall, B. Børresen, G. Hagen, M. Tsyppkin and R. Tunold, *Mater. Chem. Phys.*, 2005, **94**, 226-232.
17. A. Marshall, B. Børresen, G. Hagen, M. Tsyppkin and R. Tunold, *Electrochim. Acta*, 2006, **51**, 3161-3167.
18. S. Siracusano, V. Baglio, A. Stassi, R. Ornelas, V. Antonucci and A. S. Aricò, *Int. J. Hydrogen Energy*, 2011, **36**, 7822-7831.
19. S. Siracusano, V. Baglio, A. Di Blasi, N. Briguglio, A. Stassi, R. Ornelas, E. Trifoni, V. Antonucci and A. S. Aricò, *Int. J. Hydrogen Energy*, 2010, **35**, 5558-5568.
20. J. Ahmed and Y. Mao, *Electrochim. Acta*, 2016, **212**, 686-693.
21. A. S. Mukasyan and P. Dinka, *Int. J. Self-Propag. High-Temp Synth.*, 2007, **16**, 23-35.
22. S. T. Aruna and A. S. Mukasyan, *Curr. Opin. Solid State Mater. Sci.*, 2008, **12**, 44-50.
23. S. Gražulis, D. Chateigner, R. T. Downs, A. F. T. Yokochi, M. Quiros, L. Lutterotti, E. Manakova, J. Butkus, P. Moeck and A. Le Bail, *J. Appl. Crystallogr.*, 2009, **42**, 726-729.
24. S. Gražulis, A. Daškevič, A. Merkys, D. Chateigner, L. Lutterotti, M. Quirós, N. R. Serebryanaya, P. Moeck, R. T. Downs and A. Le Bail, *Nucleic Acids Res.*, 2012, **40**, D420-D427.
